# Supplementary material for: Self-healing composite polymer electrolyte formed via supramolecular networks for high-performance lithium-ion batteries
Source: Royal Society of Chemistry journal article supplement (doi:10.1039/c9ta01214a), 2019-01-01
Supplement: c9ta01214a1.pdf [file c9ta01214a1.pdf]

## Supporting Information

### Self-healing composite polymer electrolyte formed via supramolecular networks for high-performance lithium-ion batteries

Binghua Zhou, Ye Hyang Jo, Rui Wang, Dan He, Xingping Zhou,\* Xiaolin Xie, and  
Zhigang Xue\*

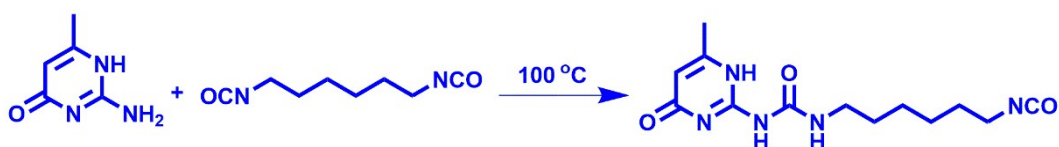

Fig. S1 Schematic representation of the synthesis route of UPy-NCO.

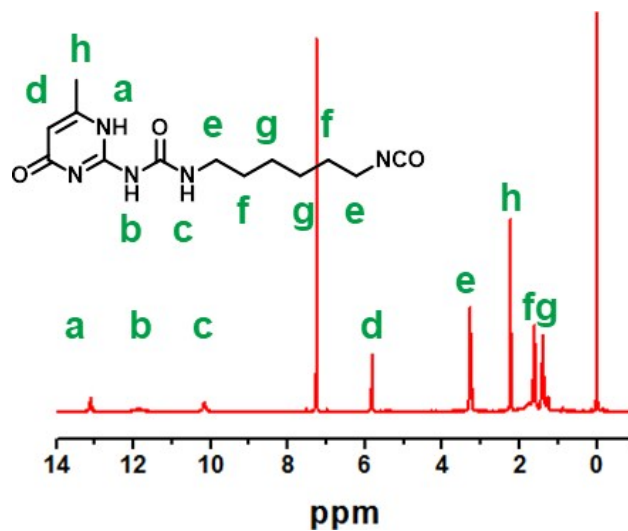

Fig. S2 The <sup>1</sup>H NMR spectra of UPy-NCO.

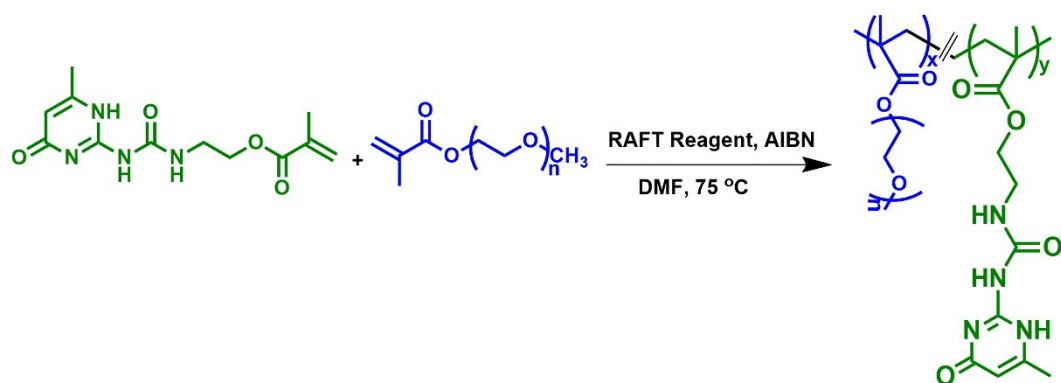

**Fig. S3** Synthesis of copolymer of PEG-UPy using the monomers of UPyMA and PEGMA.

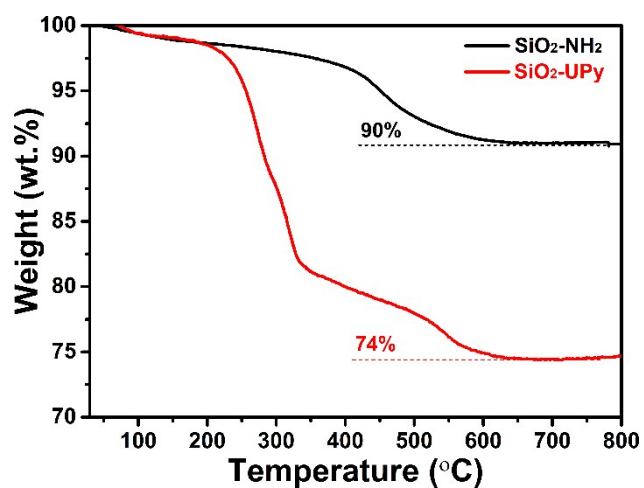

**Fig. S4** TGA thermograms of SiO<sub>2</sub>-NH<sub>2</sub> and SiO<sub>2</sub>-UPy.

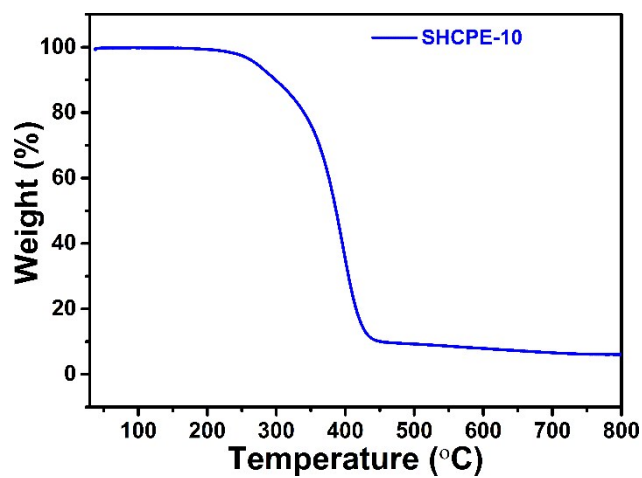

**Fig. S5** TGA curves of composite polymer electrolyte with supramolecular networks.

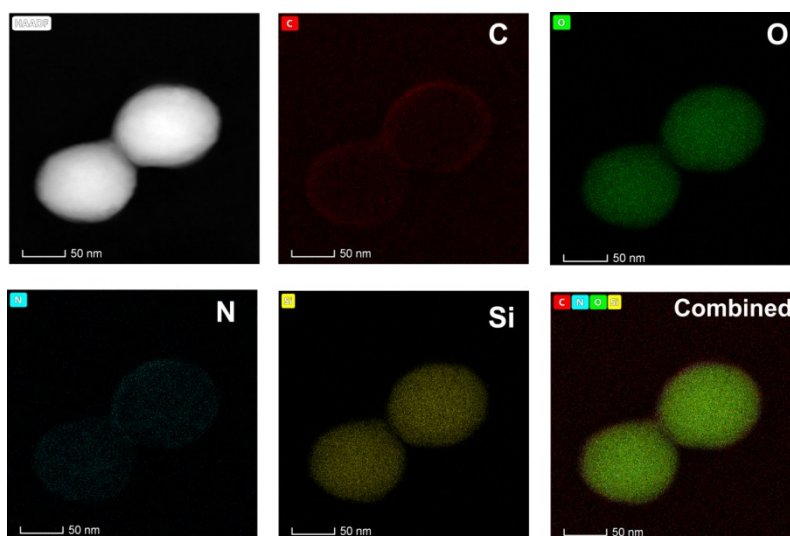

Fig. S6 Elemental mapping images of C, O, N and Si in the modified silica.

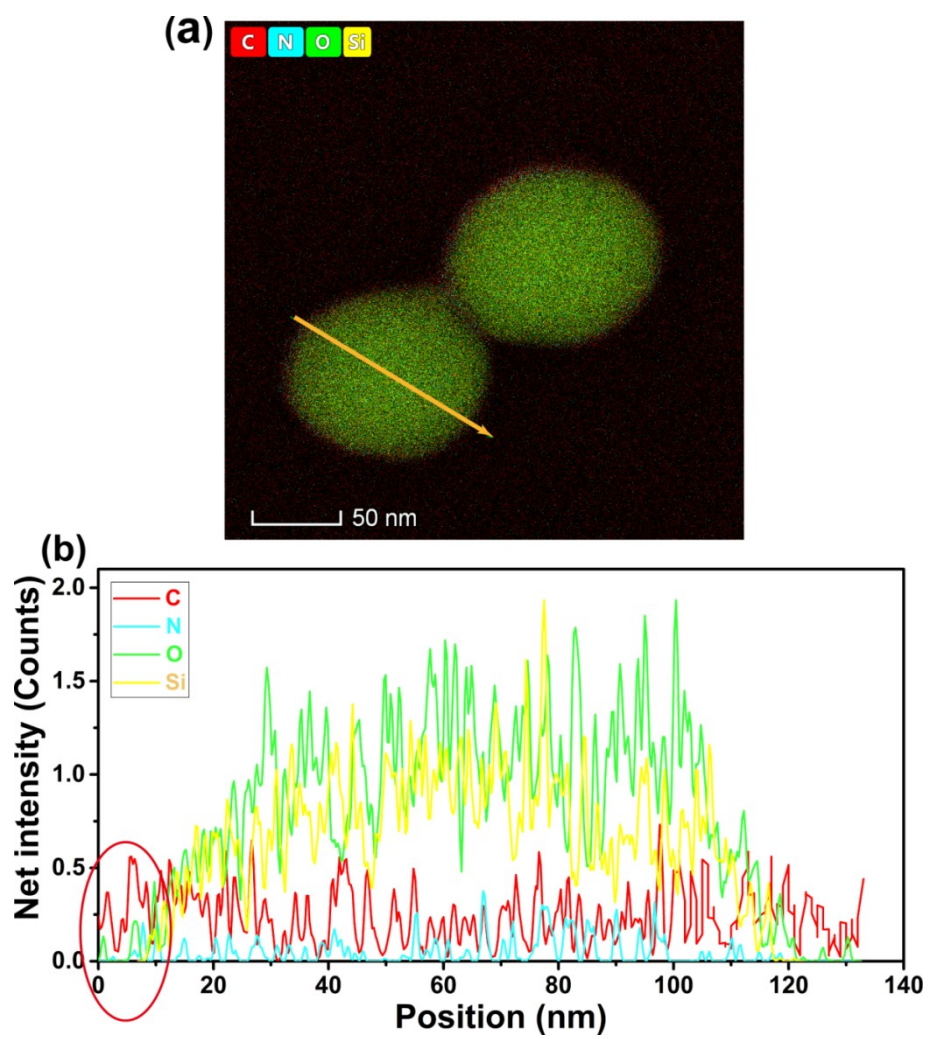

Fig. S7 EDS line-scan elemental distribution of modified silica nanoparticle.

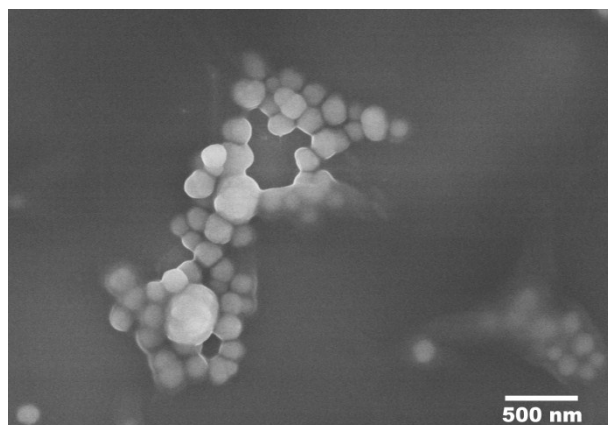

**Fig. S8** Morphologies of SiO<sub>2</sub> in composite polymer electrolyte.

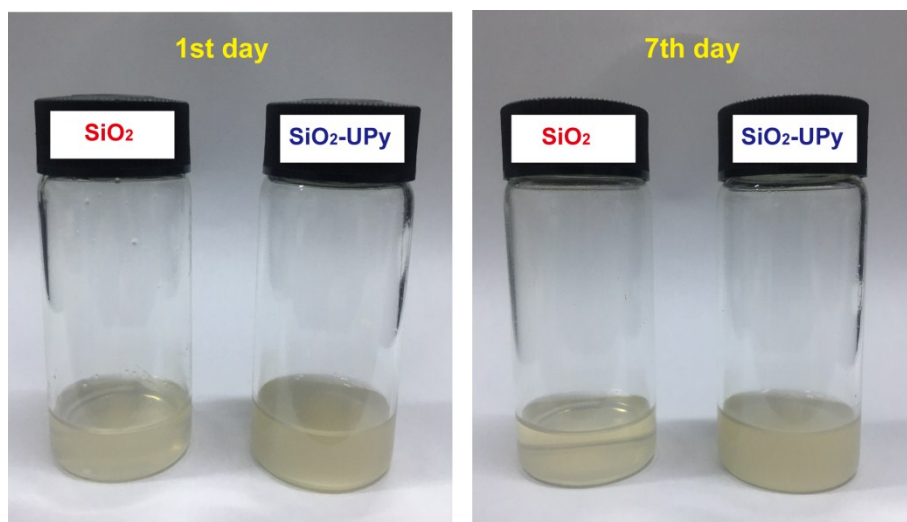

**Fig. S9** Photograph of the dispersion of SiO<sub>2</sub> and SiO<sub>2</sub>-UPy in the THF solution of PEG-UPy, a) the first day and; b) the seventh day.

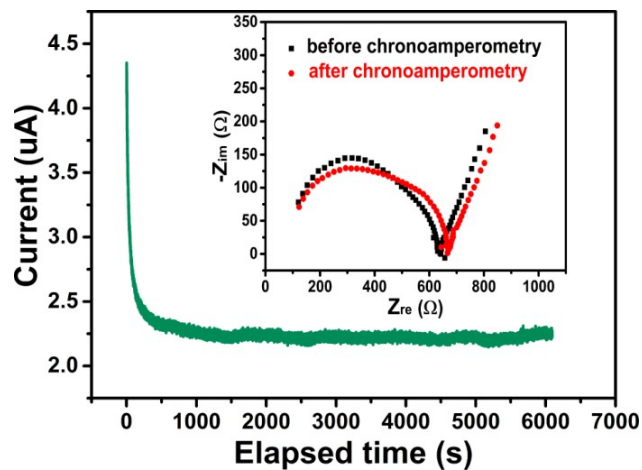

**Fig. S10** Chronoamperometry profile of Li/CPE-3/Li cell at 60 °C. The inset displays the impedance spectra before and after chronoamperometry.

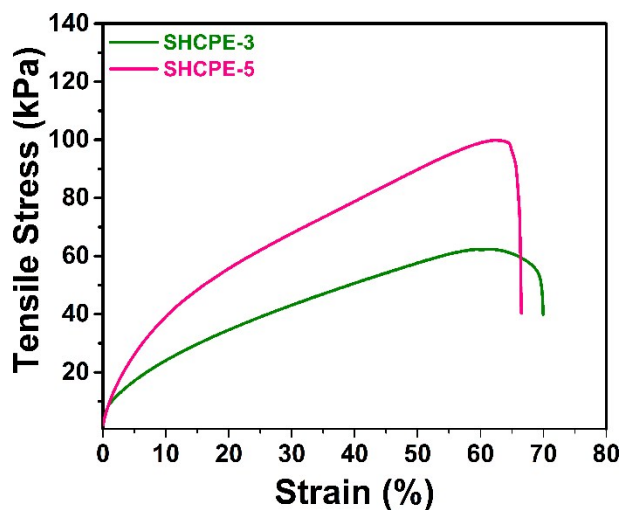

**Fig. S11** Mechanical properties of the CPE-3 and SHCPE-5 samples.

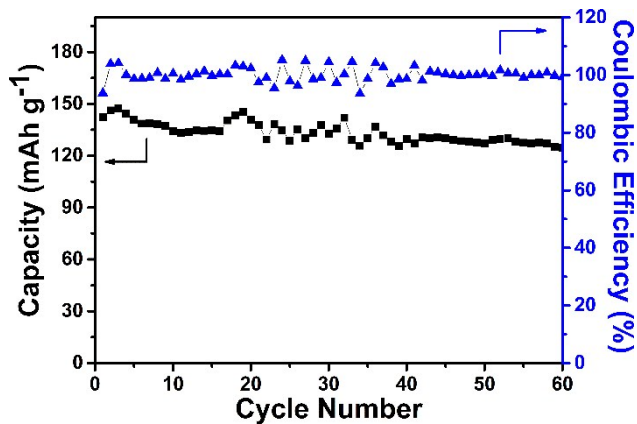

**Fig. S12** The cycling performance of Li|CPE-10|LFP cell.
